# Supplementary material for: Flexibility of nanolayers and stacks: implications in the nanostructuration of clays
Source: Royal Society of Chemistry journal article supplement (doi:10.1039/c8sm01359d), 2018-01-01
Supplement: c8sm01359d1.pdf [file c8sm01359d1.pdf]

# Flexibility of clay layers: supporting information

Tulio Honorio,<sup>\*,†,‡</sup> Laurent Brochard,<sup>†</sup> Matthieu Vandamme,<sup>†</sup> and Arthur Lebé<sup>†</sup>

<sup>†</sup>*Université Paris-Est, Laboratoire Navier (UMR 8205), CNRS, ENPC, IFSTTAR, 6 & 8 Avenue Blaise Pascal, 77455 Marne-la-Vallée, France*

<sup>‡</sup>*Current address: Université Paris-Est Créteil, Laboratoire Modélisation et Simulation Multi-Echelle, MSME UMR 8208 CNRS, 94010, Créteil cedex, France*

E-mail: [tulio.honorio-de-faria@u-pec.fr](mailto:tulio.honorio-de-faria@u-pec.fr); [tulioharia@gmail.com](mailto:tulioharia@gmail.com)

Phone: +(33) 1 64 15 36 59

## Bending modulus of clay layers

Consider a periodic plate, with period  $L$ , subjected to punctual forces in a direction  $x$  and constanty distributed in a direction  $y$  perpendicular to  $x$ . The opposed forces are

$$F_z(x) = \begin{cases} F & \text{if } x \bmod L = -\frac{L}{4} \\ -F & \text{if } x \bmod L = \frac{L}{4} \end{cases}, \text{ where } F \text{ is given in force par length unit (in } y \text{ direction).}$$

The normal efforts are zero (no in-plane loadings). Due to the symmetry of the problem, the momentum are periodic and odd in  $x$  direction and constant in  $y$  direction:

$$M_{ab}(x, y) = M_{ab}(x) = -M_{ab}(-x) = M_{ab}(x + L) \quad (1)$$

The equilibrium of moments yields:

$$\frac{\partial^2 M_{xx}}{\partial x^2} = 0 \text{ et } \left. \frac{\partial M_{xx}}{\partial x} \right|_{x^+} - \left. \frac{\partial M_{xx}}{\partial x} \right|_{x^-} = \begin{cases} F & \text{if } x \bmod L = -\frac{L}{4} \\ -F & \text{if } x \bmod L = \frac{L}{4} \end{cases} \quad (2)$$

The moments  $M_{yy}$  and  $M_{xy}$  vanish and only  $M_{xx}$  is non-zero. The expression of  $M_{xx}$  is obtained by integration of the last equation accounting for the symmetry conditions  $M_{xx}(x = -\frac{L}{2}) = M_{xx}(x = -\frac{L}{2} + L = \frac{L}{2}) = -M_{xx}(x = -(-\frac{L}{2}) = \frac{L}{2}) = 0$ :

$$M_{xx}(x) = \frac{F}{2} \begin{cases} -\frac{L}{2} - x & \text{if } -\frac{L}{2} < x < -\frac{L}{4} \\ x & \text{if } -\frac{L}{4} < x < \frac{L}{4} \\ \frac{L}{2} - x & \text{if } \frac{L}{4} < x < \frac{L}{2} \end{cases} \quad (3)$$

Since the displacement respects the same symmetries, we have  $u_x = 0$ ,  $u_y = 0$  and  $u_z(x, y) = u_z(x) = -u_z(-x) = u_z(x + L)$  with  $u_z(x = -\frac{L}{2}) = u_z(x = \frac{L}{2}) = 0$ . The expression of  $u_z$  is obtained from integration of the moment  $M_{xx}$ . The constants of integration can be obtained from the conditions imposed on the boundary and from the continuity of the derivatives of displacement  $u_z$ . We have:

$$u_z(x) = \frac{1}{D_{xxxx}} \begin{cases} -\frac{F}{12} \left(\frac{L}{2} + x\right)^3 + \frac{F}{4} \left(\frac{L}{4}\right)^2 \left(\frac{L}{2} + x\right) & \text{if } -\frac{L}{2} < x < -\frac{L}{4} \\ \frac{F}{12} x^3 - \frac{F}{4} \left(\frac{L}{4}\right)^2 x & \text{if } -\frac{L}{4} < x < \frac{L}{4} \\ \frac{F}{12} \left(\frac{L}{2} - x\right)^3 - \frac{F}{4} \left(\frac{L}{4}\right)^2 \left(\frac{L}{2} - x\right) & \text{if } \frac{L}{4} < x < \frac{L}{2} \end{cases} \quad (4)$$

For a system controlled by a displacement  $\delta$ , instead of the force  $F$ , we have:

$$\delta = u_z\left(-\frac{L}{4}\right) = -u_z\left(\frac{L}{4}\right) = \frac{F}{6D_{xxxx}} \left(\frac{L}{4}\right)^3 \Rightarrow F = 6 \left(\frac{4}{L}\right)^3 D_x \delta \quad (5)$$

Finally, the free elastic energy  $W$  per units of length (with respect to  $y$  direction) is equal to the work of external applied forces :

$$W = 2 \int_0^\delta F d\delta = 12 \left( \frac{4}{L} \right)^3 D_x \int_0^\delta \delta d\delta = 6 \left( \frac{4}{L} \right)^3 D_{xxxx} \delta^2 = \left( \frac{L}{4} \right)^3 \frac{F^2}{6D_{xxxx}} \quad (6)$$

This result can also be found by integration of the local elastic energy over the whole plate:

$$W = \frac{1}{2} \int_{-\frac{L}{2}}^{\frac{L}{2}} M_{xx} \frac{\partial^2 u_z}{\partial x^2} dx = \frac{F^2}{4D_{xxxx}} \left[ \frac{2}{3} \left( \frac{L}{4} \right)^3 \right] = \left( \frac{L}{4} \right)^3 \frac{F^2}{6D_{xxxx}} \quad (7)$$

The dimensionless formulation is retrieved by the definition of the dimensionless variables  $x^* = \frac{4}{L}x$ ,  $u_z^* = \frac{4}{L}u_z$ ,  $F^* = \frac{F}{D_{xxxx}} \left( \frac{L}{4} \right)^2$ ,  $M_{xx}^* = \frac{M_{xx}}{D_{xxxx}} \frac{L}{4}$ ,  $\delta^* = \frac{4}{L}\delta = \frac{F^*}{6}$  and  $W^* = \frac{W}{D_{xxxx}} \frac{L}{4}$ . Thus, the dimensionless forms of moment, displacement and free elastic energy read, respectively:

$$\frac{M_{xx}^*(x)}{F^*} = 6 \frac{M_{xx}^*(x)}{\delta^*} = \begin{cases} -\frac{1}{2}(2+x^*) & \text{if } -2 < x^* < -1 \\ \frac{1}{2}x^* & \text{if } -1 < x^* < 1 \\ \frac{1}{2}(2-x^*) & \text{if } 1 < x^* < 2 \end{cases} \quad (8)$$

$$\frac{u_z^*(x)}{F^*} = 6 \frac{u_z^*(x)}{\delta^*} = \begin{cases} -\frac{1}{12}(2+x^*)^3 + \frac{1}{4}(2+x^*) & \text{if } -2 < x^* < -1 \\ \frac{1}{12}(x^*)^3 - \frac{1}{4}x^* & \text{if } -1 < x^* < 1 \\ \frac{1}{12}(2-x^*)^3 - \frac{1}{4}(2-x^*) & \text{if } 1 < x^* < 2 \end{cases} \quad (9)$$

$$W^* = 6(\delta^*)^2 = \frac{1}{6}(F^*)^2 \quad (10)$$

For the sake of concision  $D_{xxxx}$  is called  $D_x$  in the paper, with  $x$  being the direction in which the problem is treated;  $y$ , the corresponding in-plane perpendicular direction and  $z$ , the direction perpendicular to the plate.
